# Supplementary material
Source: PubMed Central journal article supplement (PMC3590885)
Supplement: chest_143_3_687_ds01.pdf [file chest_143_3_687_ds01.pdf]

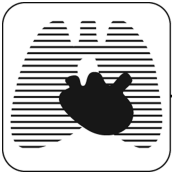

### Effect of Emphysema on CT Scan Measures of Airway Dimensions in Smokers

*Alejandro A. Diaz, MD; MeiLan K. Han, MD; Carolyn E. Come, MD, MPH; Raúl San José Estépar, PhD; James C. Ross, MS; Victor Kim, MD; Mark T. Dransfield, MD; Douglas Curran-Everett, PhD; Joyce D. Schroeder, MD; David A. Lynch, MD; Juerg Tschirren, PhD; Edwin K. Silverman, MD, PhD; and George R. Washko, MD*

**e-Table 1** Multivariate regression analysis for wall area percent (WA%) in 6 bronchial paths in subjects with COPD and without asthma history\*

| Bronchial path | Lobar Emphysema        |      |                        |         |
|----------------|------------------------|------|------------------------|---------|
|                | Segmental level        |      | Subsegmental level     |         |
|                | Regression Coefficient | P    | Regression Coefficient | P       |
| RB1            | -0.01                  | 0.27 | 0.04                   | <0.0001 |
| RB4            | -0.03                  | 0.04 | 0.01                   | 0.12    |
| RB10           | -0.00                  | 0.98 | 0.02                   | 0.03    |
| LB1            | 0.02                   | 0.08 | 0.01                   | 0.57    |
| LB4            | 0.01                   | 0.52 | 0.04                   | <.0001  |
| LB10           | 0.02                   | 0.28 | 0.04                   | 0.0004  |

\*In these analyses the sample size was 756 out of 781 subjects with COPD and asthma history. Twenty five subjects were excluded because their measurements of lobar lung volume were not available  
Abbreviations: RB1 Right upper lobe apical bronchus; RB4 Right middle lobe lateral bronchus; RB10 Right lower lobe posterior basal bronchus; LB1 Left upper lobe apicoposterior bronchus; LB4 Superior lingular bronchus; LB10 Left lower lobe posterior basal bronchus.



**e-Table 2** Multivariate regression analysis for *subsegmental* total bronchial area (TBA) in 6 bronchial paths in subjects with COPD and without asthma history\*

| Bronchial path | Regression Coefficient | P      |
|----------------|------------------------|--------|
| RB1            | -0.13                  | <.0001 |
| RB4            | -0.06                  | 0.005  |
| RB10           | -0.04                  | 0.11   |
| LB1            | -0.09                  | 0.0003 |
| LB4            | -0.09                  | 0.0003 |
| LB10           | -0.09                  | 0.01   |

\*In these analyses the sample size was 756 out of 781 subjects with COPD and asthma history. Twenty five subjects were excluded because their measurements of lobar lung volume were not available.

See **e-Table 1** for expansion of the abbreviations
